# Supplementary material
Source: Springer Nature journal article supplement (https://www.springermedizin.de/resource/supplementary/12884_2013_1272_MOESM3_ESM.pdf/9459226)

# Information Supportive of ERCS and VBAC

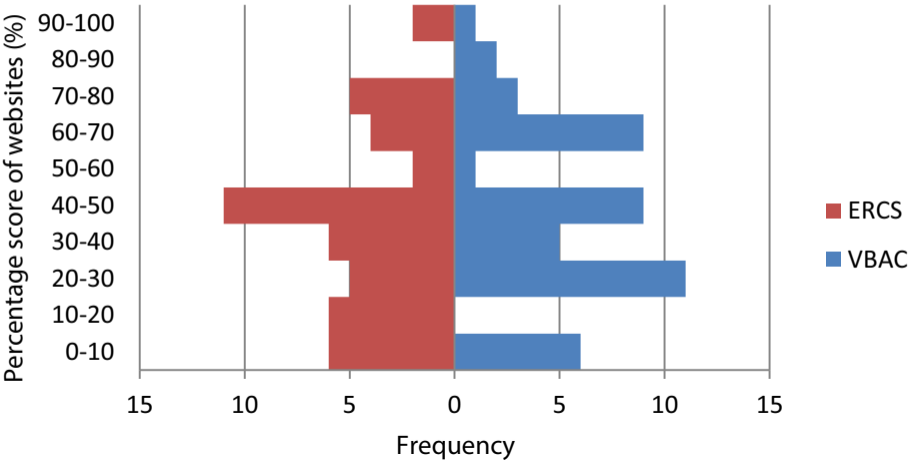

Supplement: MOESM3 [file 9459226]
